# Supplementary material for: Genome-wide association study of sleep in Drosophila melanogaster
Source: PubMed Central journal article supplement (PMC3644253; doi:10.1186/1471-2164-14-281), 2013-04-25
Supplement: 1471-2164-14-281-S1.pdf [file 1471-2164-14-281-S1.pdf]

Additional file 1. Quantitative genetic analysis of sleep phenotypes in the DGRP lines.

Analyses of variance of mean sleep phenotypes.

*d.f.*, degrees of freedom; MS, Type III Mean Squares; F, F ratio statistic; *P*, *P*-value for F ratio statistic;  $\sigma^2$ , variance component;  $H^2$ , broad sense heritability;  $r_{MF}$ , cross-sex genetic correlation; \*, MS and  $\sigma^2$  multiplied by  $10^3$ .

| Phenotype             | Analysis     | Source              | <i>d.f.</i> | MS          | F       | <i>P</i> | $\sigma^2$ | $H^2$ | $r_{MF}$ |
|-----------------------|--------------|---------------------|-------------|-------------|---------|----------|------------|-------|----------|
| Night sleep<br>(min.) | Combined Sex | Block               | 3           | 1053739.68  | 1.96    | 0.1234   | 206.43     | 0.54  | 0.76     |
|                       |              | Sex                 | 1           | 763.09      | 0.01    | 0.9190   | Fixed      |       |          |
|                       |              | Line(Block)         | 164         | 441081.10   | 5.99    | <0.0001  | 6202.78    |       |          |
|                       |              | Sex×Line(Block)     | 164         | 71205.22    | 8.04    | <0.0001  | 2066.41    |       |          |
|                       |              | Rep(Block)          | 12          | 110791.73   | 7.89    | 0.0001   | 151.17     |       |          |
|                       |              | Sex×Rep(Block)      | 12          | 11634.82    | 1.31    | 0.2065   | 7.49       |       |          |
|                       |              | Rep×Line(Block)     | 492         | 11282.03    | 1.27    | 0.0038   | 155.54     |       |          |
|                       |              | Sex×Rep×Line(Block) | 490         | 8866.51     | 1.44    | <0.0001  | 349.39     |       |          |
|                       |              | Error               | 8897        | 6167.76     | --      | --       | 6172.65    |       |          |
|                       | Males        | Block               | 3           | 323954.85   | 1.28    | 0.2832   | 56.14      | 0.56  |          |
|                       |              | Line(Block)         | 164         | 225069.41   | 26.28   | <0.0001  | 7198.23    |       |          |
|                       |              | Rep(Block)          | 12          | 37959.11    | 4.43    | <0.0001  | 91.50      |       |          |
|                       |              | Line×Rep(Block)     | 490         | 8580.19     | 1.68    | <0.0001  | 454.40     |       |          |
|                       |              | Error               | 4462        | 5099.14     | --      | --       | 5099.57    |       |          |
|                       | Females      | Block               | 3           | 788080.04   | 2.19    | 0.0926   | 342.63     | 0.53  |          |
| Line(Block)           |              | 164                 | 288060.57   | 25.11       | <0.0001 | 9345.94  |            |       |          |
| Rep(Block)            |              | 12                  | 84748.26    | 7.39        | <0.0001 | 227.06   |            |       |          |
| Line×Rep(Block)       |              | 492                 | 11489.73    | 1.59        | <0.0001 | 549.57   |            |       |          |
| Error                 |              | 4435                | 7242.89     | --          | --      | 7254.30  |            |       |          |
| Day sleep<br>(min.)   | Combined Sex | Block               | 3           | 1706424.93  | 2.52    | 0.0618   | 416.49     | 0.49  | 0.70     |
|                       |              | Sex                 | 1           | 35593659.52 | 280.04  | <0.0001  | Fixed      |       |          |
|                       |              | Line(Block)         | 164         | 518986.18   | 4.78    | <0.0001  | 6693.28    |       |          |
|                       |              | Sex×Line(Block)     | 164         | 105107.94   | 6.30    | <0.0001  | 2985.18    |       |          |
|                       |              | Rep(Block)          | 12          | 180974.81   | 4.20    | 0.0063   | 202.83     |       |          |
|                       |              | Sex×Rep(Block)      | 12          | 39568.82    | 2.37    | 0.0056   | 80.60      |       |          |
|                       |              | Rep×Line(Block)     | 492         | 20231.49    | 1.21    | 0.0171   | 231.69     |       |          |
|                       |              | Sex×Rep×Line(Block) | 490         | 16713.17    | 2.05    | <0.0001  | 1123.85    |       |          |
|                       |              | Error               | 8897        | 8146.71     | --      | --       | 8149.32    |       |          |
|                       | Males        | Block               | 3           | 1157289.69  | 2.91    | 0.0414   | 590.02     | 0.46  |          |
|                       |              | Line(Block)         | 164         | 261022.90   | 14.19   | <0.0001  | 7916.75    |       |          |
|                       |              | Rep(Block)          | 12          | 157967.48   | 8.59    | <0.0001  | 423.73     |       |          |
|                       |              | Line×Rep(Block)     | 490         | 18443.77    | 2.71    | <0.0001  | 1521.89    |       |          |
|                       |              | Error               | 4462        | 6805.40     | --      | --       | 6806.32    |       |          |
|                       | Females      | Block               | 3           | 768835.63   | 1.88    | 0.1357   | 294.00     | 0.51  |          |
| Line(Block)           |              | 164                 | 364092.68   | 19.74       | <0.0001 | 11425.29 |            |       |          |
| Rep(Block)            |              | 12                  | 65570.78    | 3.56        | <0.0001 | 140.79   |            |       |          |
| Line×Rep(Block)       |              | 492                 | 18477.80    | 1.95        | <0.0001 | 1180.41  |            |       |          |
| Error                 |              | 4435                | 9496.18     | --          | --      | 9502.57  |            |       |          |
| Night bout<br>number  | Combined Sex | Block               | 3           | 3480.80     | 2.47    | 0.0679   | 0.85       | 0.42  | 0.74     |
|                       |              | Sex                 | 1           | 2609.38     | 16.37   | 0.0001   | Fixed      |       |          |
|                       |              | Line(Block)         | 164         | 968.57      | 5.41    | <0.0001  | 13.08      |       |          |
|                       |              | Sex×Line(Block)     | 164         | 178.04      | 4.87    | <0.0001  | 4.71       |       |          |
|                       |              | Rep(Block)          | 12          | 484.70      | 24.51   | <0.0001  | 0.70       |       |          |
|                       |              | Sex×Rep(Block)      | 12          | 18.77       | 0.51    | 0.9062   | 0.00       |       |          |
|                       |              | Rep×Line(Block)     | 492         | 37.61       | 1.03    | 0.3783   | 0.07       |       |          |
|                       |              | Sex×Rep×Line(Block) | 490         | 36.58       | 1.71    | <0.0001  | 1.96       |       |          |
|                       |              | Error               | 8897        | 21.40       | --      | --       | 21.40      |       |          |
|                       | Males        | Block               | 3           | 1017.78     | 1.40    | 0.2496   | 0.24       | 0.43  |          |
|                       |              | Line(Block)         | 164         | 525.38      | 14.94   | <0.0001  | 16.16      |       |          |
|                       |              | Rep(Block)          | 12          | 242.37      | 6.90    | <0.0001  | 0.63       |       |          |
|                       |              | Line×Rep(Block)     | 490         | 35.23       | 1.96    | <0.0001  | 2.26       |       |          |
|                       |              | Error               | 4462        | 18.00       | --      | --       | 18.00      |       |          |
|                       | Females      | Block               | 3           | 2681.41     | 3.15    | 0.0288   | 1.52       | 0.40  |          |
| Line(Block)           |              | 164                 | 626.56      | 16.12       | <0.0001 | 19.36    |            |       |          |
| Rep(Block)            |              | 12                  | 266.89      | 6.87        | <0.0001 | 0.71     |            |       |          |
| Line×Rep(Block)       |              | 492                 | 38.94       | 1.57        | <0.0001 | 1.85     |            |       |          |
| Error                 |              | 4435                | 24.82       | --          | --      | 24.84    |            |       |          |

| Phenotype                     | Analysis     | Source              | d.f.      | MS         | F       | P       | $\sigma^2$ | $H^2$ | $r_{MF}$ |
|-------------------------------|--------------|---------------------|-----------|------------|---------|---------|------------|-------|----------|
| Day bout number               | Combined Sex | Block               | 3         | 630.83     | 0.42    | 0.7427  | 0.00       | 0.33  | 0.58     |
|                               |              | Sex                 | 1         | 7064.63    | 12.23   | 0.0014  | Fixed      |       |          |
|                               |              | Line(Block)         | 164       | 952.74     | 3.01    | <0.0001 | 10.48      |       |          |
|                               |              | Sex×Line(Block)     | 164       | 312.71     | 4.38    | <0.0001 | 8.01       |       |          |
|                               |              | Rep(Block)          | 12        | 648.94     | 1.88    | 0.1423  | 0.39       |       |          |
|                               |              | Sex×Rep(Block)      | 12        | 341.11     | 4.78    | <0.0001 | 0.89       |       |          |
|                               |              | Rep×Line(Block)     | 492       | 75.68      | 1.06    | 0.2646  | 0.29       |       |          |
|                               |              | Sex×Rep×Line(Block) | 490       | 71.53      | 2.35    | <0.0001 | 5.40       |       |          |
|                               |              | Error               | 8897      | 30.50      | --      | --      | 30.50      |       |          |
|                               | Males        | Block               | 3         | 704.18     | 0.54    | 0.6565  | 0.00       | 0.29  |          |
|                               |              | Line(Block)         | 164       | 514.41     | 6.65    | <0.0001 | 14.42      |       |          |
|                               |              | Rep(Block)          | 12        | 864.94     | 11.20   | <0.0001 | 2.30       |       |          |
|                               |              | Line×Rep(Block)     | 490       | 77.52      | 3.04    | <0.0001 | 6.82       |       |          |
|                               |              | Error               | 4462      | 25.51      | --      | --      | 25.52      |       |          |
|                               | Females      | Block               | 3         | 645.04     | 0.80    | 0.4939  | 0.00       | 0.36  |          |
| Line(Block)                   |              | 164                 | 752.84    | 10.76      | <0.0001 | 22.64   |            |       |          |
| Rep(Block)                    |              | 12                  | 123.74    | 1.77       | 0.0504  | 0.17    |            |       |          |
| Line×Rep(Block)               |              | 492                 | 70.13     | 1.97       | <0.0001 | 4.57    |            |       |          |
| Error                         |              | 4435                | 35.51     | --         | --      | 35.50   |            |       |          |
| Night avg. bout length (min.) | Combined Sex | Block               | 3         | 1552880.11 | 4.37    | 0.0063  | 470.79     | 0.38  | 0.77     |
|                               |              | Sex                 | 1         | 45339.74   | 1.06    | 0.3068  | Fixed      |       |          |
|                               |              | Line(Block)         | 164       | 263510.85  | 6.13    | <0.0001 | 3653.06    |       |          |
|                               |              | Sex×Line(Block)     | 164       | 40009.34   | 4.27    | <0.0001 | 1113.43    |       |          |
|                               |              | Rep(Block)          | 12        | 105937.84  | 6.85    | 0.0002  | 134.00     |       |          |
|                               |              | Sex×Rep(Block)      | 12        | 12490.92   | 1.33    | 0.1958  | 31.00      |       |          |
|                               |              | Rep×Line(Block)     | 492       | 12373.68   | 1.32    | 0.0011  | 186.86     |       |          |
|                               |              | Sex×Rep×Line(Block) | 490       | 9380.87    | 1.41    | <0.0001 | 353.35     |       |          |
|                               |              | Error               | 8896      | 6638.25    | --      | --      | 6648.70    |       |          |
|                               | Males        | Block               | 3         | 254426.03  | 1.30    | 0.2794  | 41.55      | 0.41  |          |
|                               |              | Line(Block)         | 164       | 149561.92  | 14.35   | <0.0001 | 4643.52    |       |          |
|                               |              | Rep(Block)          | 12        | 57817.56   | 5.55    | <0.0001 | 146.57     |       |          |
|                               |              | Line×Rep(Block)     | 490       | 10439.10   | 1.73    | <0.0001 | 575.91     |       |          |
|                               |              | Error               | 4462      | 6017.66    | --      | --      | 6021.76    |       |          |
|                               | Females      | Block               | 3         | 1585366.18 | 7.69    | 0.0001  | 1097.66    | 0.35  |          |
| Line(Block)                   |              | 164                 | 156048.96 | 13.93      | <0.0001 | 4807.79 |            |       |          |
| Rep(Block)                    |              | 12                  | 62233.33  | 5.56       | <0.0001 | 174.13  |            |       |          |
| Line×Rep(Block)               |              | 492                 | 11219.66  | 1.54       | <0.0001 | 502.77  |            |       |          |
| Error                         |              | 4434                | 7262.75   | --         | --      | 7281.11 |            |       |          |
| Day avg. bout length (min.)   | Combined Sex | Block               | 3         | 45468.01   | 2.31    | 0.0904  | 10.19      | 0.19  | 0.69     |
|                               |              | Sex                 | 1         | 755971.49  | 63.70   | <0.0001 | Fixed      |       |          |
|                               |              | Line(Block)         | 164       | 11538.82   | 1.97    | <0.0001 | 93.04      |       |          |
|                               |              | Sex×Line(Block)     | 164       | 5626.32    | 3.41    | <0.0001 | 135.33     |       |          |
|                               |              | Rep(Block)          | 12        | 10139.65   | 1.23    | 0.3582  | 1.86       |       |          |
|                               |              | Sex×Rep(Block)      | 12        | 7990.32    | 4.84    | <0.0001 | 21.98      |       |          |
|                               |              | Rep×Line(Block)     | 492       | 1892.61    | 1.15    | 0.0661  | 16.78      |       |          |
|                               |              | Sex×Rep×Line(Block) | 490       | 1652.65    | 2.04    | <0.0001 | 109.21     |       |          |
|                               |              | Error               | 8896      | 811.86     | --      | --      | 813.17     |       |          |
|                               | Males        | Block               | 3         | 62982.80   | 2.13    | 0.1151  | 26.28      | 0.21  |          |
|                               |              | Line(Block)         | 164       | 15436.23   | 5.03    | <0.0001 | 413.40     |       |          |
|                               |              | Rep(Block)          | 12        | 17374.11   | 5.66    | <0.0001 | 43.66      |       |          |
|                               |              | Line×Rep(Block)     | 490       | 3078.90    | 2.45    | <0.0001 | 238.53     |       |          |
|                               |              | Error               | 4462      | 1259.16    | --      | --      | 1260.82    |       |          |
|                               | Females      | Block               | 3         | 3284.37    | 1.54    | 0.2141  | 0.82       | 0.10  |          |
| Line(Block)                   |              | 164                 | 1760.60   | 3.72       | <0.0001 | 43.39   |            |       |          |
| Rep(Block)                    |              | 12                  | 855.19    | 1.81       | 0.0442  | 1.24    |            |       |          |
| Line×Rep(Block)               |              | 492                 | 473.67    | 1.31       | <0.0001 | 12.08   |            |       |          |
| Error                         |              | 4434                | 361.72    | --         | --      | 363.85  |            |       |          |

| Phenotype                     | Analysis     | Source              | d.f.  | MS        | F      | P       | $\sigma^2$ | $H^2$ | $r_{MF}$ |
|-------------------------------|--------------|---------------------|-------|-----------|--------|---------|------------|-------|----------|
| Waking activity<br>(cts/min.) | Combined Sex | Block               | 3     | 2190.00   | 0.43   | 0.7346  | 0.00       | 0.39  | 0.84     |
|                               |              | Sex                 | 1     | 242031.00 | 247.27 | <0.0001 | Fixed      |       |          |
|                               |              | Line(Block)         | 164   | 4979.80   | 6.14   | <0.0001 | 68.54      |       |          |
|                               |              | Sex×Line(Block)     | 164   | 798.20    | 4.35   | <0.0001 | 20.62      |       |          |
|                               |              | Rep(Block)          | 12    | 372.10    | 0.97   | 0.5182  | 0.00       |       |          |
|                               |              | Sex×Rep(Block)      | 12    | 370.38    | 2.02   | 0.0209  | 0.53       |       |          |
|                               |              | Rep×Line(Block)     | 492   | 196.20    | 1.07   | 0.2281  | 0.80       |       |          |
|                               |              | Sex×Rep×Line(Block) | 490   | 183.49    | 1.42   | <0.0001 | 7.13       |       |          |
|                               |              | Error               | 8897  | 129.16    | --     | --      | 129.18     |       |          |
|                               | Males        | Block               | 3     | 1715.10   | 0.41   | 0.7496  | 0.00       | 0.41  |          |
|                               |              | Line(Block)         | 164   | 3944.04   | 18.01  | <0.0001 | 124.67     |       |          |
|                               |              | Rep(Block)          | 12    | 533.00    | 2.43   | 0.0044  | 0.94       |       |          |
|                               |              | Line×Rep(Block)     | 490   | 0.22      | 1.30   | <0.0001 | 6.64       |       |          |
|                               |              | Error               | 4462  | 0.17      | --     | --      | 168.39     |       |          |
|                               |              | Females             | Block | 3         | 1.14   | 0.61    | 0.6088     |       | 0.00     |
| Line(Block)                   | 164          | 1.82                | 11.43 | <0.0001   | 53.96  |         |            |       |          |
| Rep(Block)                    | 12           | 0.21                | 1.31  | 0.2094    | 0.12   |         |            |       |          |
| Line×Rep(Block)               | 492          | 0.16                | 1.78  | <0.0001   | 9.18   |         |            |       |          |
| Error                         | 4435         | 0.09                | --    | --        | 89.78  |         |            |       |          |

Analyses of variance of sleep coefficients of environmental variation ( $CV_E$ ) in the DGRP lines.

*d.f.*, degrees of freedom; MS, Type III Mean Squares; F, F ratio statistic; *P*, *P*-value for F ratio statistic;  $\sigma^2$ , variance component;  $H^2$ , broad sense heritability;  $r_{MF}$ , cross-sex genetic correlation.

| Phenotype                      | Analysis                     | Source          | <i>d.f.</i> | MS       | F       | <i>P</i> | $\sigma^2$ | $H^2$ | $r_{MF}$ |
|--------------------------------|------------------------------|-----------------|-------------|----------|---------|----------|------------|-------|----------|
| Night sleep<br>$CV_E$          | Combined Sex                 | Block           | 3           | 394.19   | 0.54    | 0.6556   | 0.00       | 0.72  | 0.74     |
|                                |                              | Sex             | 1           | 2964.36  | 17.09   | 0.0001   | --         |       |          |
|                                |                              | Line(Block)     | 164         | 730.27   | 4.21    | <0.0001  | 68.95      |       |          |
|                                |                              | Sex×Line(Block) | 167         | 173.46   | 4.35    | <0.0001  | 33.45      |       |          |
|                                |                              | Error           | 1006        | 39.88    | --      | --       | 39.88      |       |          |
|                                | Males                        | Block           | 3           | 115.72   | 0.43    | 0.7349   | 0.00       | 0.69  |          |
|                                |                              | Line(Block)     | 164         | 272.10   | 9.97    | <0.0001  | 60.64      |       |          |
|                                |                              | Error           | 502         | 27.28    | --      | --       | 27.28      |       |          |
|                                | Females                      | Block           | 3           | 391.49   | 0.62    | 0.6042   | 0.00       | 0.73  |          |
|                                |                              | Line(Block)     | 164         | 633.34   | 12.08   | <0.0001  | 144.14     |       |          |
|                                |                              | Error           | 504         | 52.43    | --      | --       | 52.43      |       |          |
|                                | Day sleep<br>$CV_E$          | Combined Sex    | Block       | 3        | 3031.18 | 3.53     | 0.0163     | 6.58  | 0.55     |
| Sex                            |                              |                 | 1           | 68301.84 | 223.13  | <0.0001  | --         |       |          |
| Line(Block)                    |                              |                 | 164         | 859.84   | 2.81    | <0.0001  | 69.22      |       |          |
| Sex×Line(Block)                |                              |                 | 167         | 306.16   | 3.29    | <0.0001  | 53.32      |       |          |
| Error                          |                              |                 | 1006        | 93.19    | --      | --       | 93.18      |       |          |
| Males                          |                              | Block           | 3           | 573.55   | 1.55    | 0.2043   | 1.14       | 0.55  |          |
|                                |                              | Line(Block)     | 164         | 370.97   | 5.99    | <0.0001  | 77.46      |       |          |
|                                |                              | Error           | 502         | 61.96    | --      | --       | 61.96      |       |          |
| Females                        |                              | Block           | 3           | 3593.88  | 4.61    | 0.0040   | 16.97      | 0.54  |          |
|                                |                              | Line(Block)     | 164         | 779.74   | 6.27    | <0.0001  | 163.87     |       |          |
|                                |                              | Error           | 504         | 124.29   | --      | --       | 124.29     |       |          |
| Night bout<br>number<br>$CV_E$ |                              | Combined Sex    | Block       | 3        | 5144.01 | 8.15     | <0.0001    | 13.59 | 0.31     |
|                                | Sex                          |                 | 1           | 43801.84 | 18.84   | <0.0001  | --         |       |          |
|                                | Line(Block)                  |                 | 164         | 631.16   | 2.71    | <0.0001  | 49.84      |       |          |
|                                | Sex×Line(Block)              |                 | 167         | 232.50   | 1.60    | <0.0001  | 21.80      |       |          |
|                                | Error                        |                 | 1006        | 144.96   | --      | --       | 145.02     |       |          |
|                                | Males                        | Block           | 3           | 959.83   | 2.33    | 0.0759   | 3.32       | 0.33  |          |
|                                |                              | Line(Block)     | 164         | 411.44   | 3.05    | <0.0001  | 69.40      |       |          |
|                                |                              | Error           | 502         | 134.98   | --      | --       | 135.02     |       |          |
|                                | Females                      | Block           | 3           | 5083.51  | 11.57   | <0.0001  | 27.73      | 0.28  |          |
|                                |                              | Line(Block)     | 164         | 439.45   | 2.84    | <0.0001  | 71.13      |       |          |
|                                |                              | Error           | 504         | 154.91   | --      | --       | 154.91     |       |          |
|                                | Day bout<br>number<br>$CV_E$ | Combined Sex    | Block       | 3        | 1101.03 | 2.11     | 0.1011     | 1.74  | 0.47     |
| Sex                            |                              |                 | 1           | 3463.15  | 11.12   | 0.0011   | --         |       |          |
| Line(Block)                    |                              |                 | 164         | 522.11   | 1.68    | 0.0005   | 26.32      |       |          |
| Sex×Line(Block)                |                              |                 | 167         | 311.62   | 3.42    | <0.0001  | 55.22      |       |          |
| Error                          |                              |                 | 1006        | 91.09    | --      | --       | 91.08      |       |          |
| Males                          |                              | Block           | 3           | 510.69   | 2.15    | 0.0958   | 1.63       | 0.31  |          |
|                                |                              | Line(Block)     | 164         | 237.56   | 2.79    | <0.0001  | 38.20      |       |          |
|                                |                              | Error           | 502         | 85.11    | --      | --       | 85.08      |       |          |
| Females                        |                              | Block           | 3           | 1093.30  | 1.84    | 0.1412   | 2.95       | 0.55  |          |
|                                |                              | Line(Block)     | 164         | 592.92   | 6.11    | <0.0001  | 124.05     |       |          |
|                                |                              | Error           | 504         | 97.05    | --      | --       | 97.15      |       |          |

| Phenotype                           | Analysis     | Source          | d.f.   | MS       | F     | P       | $\sigma^2$ | $H^2$ | $r_{MF}$ |
|-------------------------------------|--------------|-----------------|--------|----------|-------|---------|------------|-------|----------|
| Night avg.<br>bout length<br>$CV_E$ | Combined Sex | Block           | 3      | 10057.95 | 7.89  | 0.0001  | 26.13      | 0.15  | 0.76     |
|                                     |              | Sex             | 1      | 10369.93 | 15.71 | 0.0001  | --         |       |          |
|                                     |              | Line(Block)     | 164    | 1275.06  | 1.93  | <0.0001 | 76.98      |       |          |
|                                     |              | Sex×Line(Block) | 167    | 660.06   | 1.17  | 0.0812  | 23.91      |       |          |
|                                     |              | Error           | 1006   | 563.12   | --    | --      | 563.31     |       |          |
|                                     | Males        | Block           | 3      | 3473.51  | 3.48  | 0.0174  | 14.45      | 0.14  |          |
|                                     |              | Line(Block)     | 164    | 999.49   | 1.66  | <0.0001 | 99.67      |       |          |
|                                     |              | Error           | 502    | 600.71   | --    | --      | 601.07     |       |          |
|                                     | Females      | Block           | 3      | 6904.37  | 7.34  | 0.0001  | 35.77      | 0.16  |          |
|                                     |              | Line(Block)     | 164    | 940.16   | 1.79  | <0.0001 | 103.62     |       |          |
| Error                               |              | 504             | 525.68 | --       | --    | 525.68  |            |       |          |
| Day avg.<br>bout length<br>$CV_E$   | Combined Sex | Block           | 3      | 3073.13  | 2.73  | 0.0458  | 5.76       | 0.06  | 0.96     |
|                                     |              | Sex             | 1      | 16643.68 | 21.81 | <0.0001 | --         |       |          |
|                                     |              | Line(Block)     | 164    | 1126.65  | 1.48  | 0.0063  | 45.44      |       |          |
|                                     |              | Sex×Line(Block) | 167    | 763.12   | 1.02  | 0.4138  | 4.53       |       |          |
|                                     |              | Error           | 1006   | 746.25   | --    | --      | 745.97     |       |          |
|                                     | Males        | Block           | 3      | 2088.19  | 2.00  | 0.1162  | 6.34       | 0.05  |          |
|                                     |              | Line(Block)     | 164    | 1044.82  | 1.22  | 0.0515  | 48.28      |       |          |
|                                     |              | Error           | 502    | 854.12   | --    | --      | 853.51     |       |          |
|                                     | Females      | Block           | 3      | 2817.78  | 3.42  | 0.0188  | 12.15      | 0.07  |          |
|                                     |              | Line(Block)     | 164    | 824.97   | 1.29  | 0.0190  | 46.58      |       |          |
| Error                               |              | 504             | 638.80 | --       | --    | 638.80  |            |       |          |
| Waking<br>activity<br>$CV_E$        | Combined Sex | Block           | 3      | 137.89   | 0.58  | 0.6278  | 0.00       | 0.24  | 0.98     |
|                                     |              | Sex             | 1      | 35.75    | 0.47  | 0.4924  | --         |       |          |
|                                     |              | Line(Block)     | 164    | 237.07   | 3.14  | <0.0001 | 20.27      |       |          |
|                                     |              | Sex×Line(Block) | 167    | 75.51    | 1.11  | 0.1823  | 1.80       |       |          |
|                                     |              | Error           | 1006   | 68.15    | --    | --      | 68.19      |       |          |
|                                     | Males        | Block           | 3      | 202.00   | 1.08  | 0.3607  | 0.10       | 0.3   |          |
|                                     |              | Line(Block)     | 164    | 187.76   | 2.74  | <0.0001 | 29.85      |       |          |
|                                     |              | Error           | 502    | 68.61    | --    | --      | 68.59      |       |          |
|                                     | Females      | Block           | 3      | 88.26    | 0.70  | 0.5509  | 0.00       | 0.17  |          |
|                                     |              | Line(Block)     | 164    | 125.36   | 1.85  | <0.0001 | 14.25      |       |          |
| Error                               |              | 504             | 67.68  | --       | --    | 67.68   |            |       |          |

Phenotypic and genetic correlations. Phenotypic correlations are above the diagonal; genetic correlations are below the diagonal. Bold indicates that the correlation is significantly different from zero.

| Trait                                  | Night sleep  | Day sleep    | Night bout number | Day bout number | Night avg. bout length | Day avg. bout length | Waking activity | Night sleep $CV_{\epsilon}$ | Day sleep $CV_{\epsilon}$ | Night bout number $CV_{\epsilon}$ | Day bout number $CV_{\epsilon}$ | Night avg. bout length $CV_{\epsilon}$ | Day avg. bout length $CV_{\epsilon}$ | Waking activity $CV_{\epsilon}$ |
|----------------------------------------|--------------|--------------|-------------------|-----------------|------------------------|----------------------|-----------------|-----------------------------|---------------------------|-----------------------------------|---------------------------------|----------------------------------------|--------------------------------------|---------------------------------|
| Night sleep                            |              | <b>0.20</b>  | <b>-0.29</b>      | -0.02           | <b>0.31</b>            | 0.10                 | 0.02            | <b>-0.52</b>                | <b>-0.18</b>              | <b>0.23</b>                       | -0.06                           | 0.00                                   | 0.04                                 | 0.08                            |
| Day sleep                              | <b>0.38</b>  |              | -0.11             | 0.10            | 0.11                   | <b>0.17</b>          | 0.05            | <b>-0.21</b>                | <b>-0.41</b>              | 0.03                              | <b>-0.19</b>                    | -0.06                                  | 0.05                                 | 0.09                            |
| Night bout number                      | <b>-0.61</b> | <b>-0.25</b> |                   | 0.11            | <b>-0.33</b>           | -0.10                | -0.05           | <b>0.26</b>                 | 0.08                      | <b>-0.27</b>                      | -0.04                           | 0.03                                   | -0.06                                | -0.06                           |
| Day bout number                        | -0.05        | <b>0.24</b>  | <b>0.31</b>       |                 | -0.10                  | -0.08                | -0.15           | 0.02                        | -0.11                     | -0.07                             | <b>-0.20</b>                    | 0.02                                   | -0.05                                | 0.01                            |
| Night avg. bout length                 | <b>0.69</b>  | <b>0.26</b>  | <b>-0.82</b>      | <b>-0.28</b>    |                        | 0.10                 | 0.06            | <b>-0.28</b>                | -0.08                     | <b>0.28</b>                       | 0.03                            | -0.02                                  | 0.06                                 | 0.05                            |
| Day avg. bout length                   | <b>0.29</b>  | <b>0.54</b>  | <b>-0.36</b>      | <b>-0.34</b>    | <b>0.39</b>            |                      | 0.12            | -0.09                       | -0.13                     | 0.06                              | 0.03                            | -0.01                                  | 0.09                                 | 0.07                            |
| Waking activity                        | 0.05         | 0.11         | -0.13             | <b>-0.42</b>    | 0.15                   | <b>0.44</b>          |                 | -0.04                       | -0.03                     | 0.00                              | 0.10                            | -0.03                                  | 0.04                                 | 0.10                            |
| Night sleep $CV_{\epsilon}$            | <b>-0.83</b> | <b>-0.36</b> | <b>0.47</b>       | 0.04            | <b>-0.55</b>           | <b>-0.25</b>         | -0.07           |                             | <b>0.24</b>               | -0.14                             | 0.10                            | 0.08                                   | -0.01                                | -0.06                           |
| Day sleep $CV_{\epsilon}$              | <b>-0.33</b> | <b>-0.78</b> | <b>0.18</b>       | <b>-0.27</b>    | <b>-0.17</b>           | <b>-0.39</b>         | -0.07           | <b>0.39</b>                 |                           | 0.02                              | <b>0.31</b>                     | 0.10                                   | 0.02                                 | -0.02                           |
| Night bout number $CV_{\epsilon}$      | <b>0.56</b>  | 0.08         | <b>-0.75</b>      | <b>-0.23</b>    | <b>0.80</b>            | <b>0.25</b>          | 0.00            | <b>-0.30</b>                | 0.05                      |                                   | 0.08                            | 0.11                                   | 0.07                                 | 0.02                            |
| Day bout number $CV_{\epsilon}$        | -0.11        | <b>-0.41</b> | -0.10             | <b>-0.51</b>    | 0.08                   | 0.11                 | 0.22            | <b>0.18</b>                 | <b>0.61</b>               | <b>0.20</b>                       |                                 | 0.04                                   | 0.09                                 | 0.06                            |
| Night avg. bout length $CV_{\epsilon}$ | -0.01        | <b>-0.22</b> | 0.10              | 0.10            | -0.08                  | <b>0.39</b>          | -0.13           | <b>0.25</b>                 | <b>0.36</b>               | <b>0.53</b>                       | <b>0.16</b>                     |                                        | 0.05                                 | 0.01                            |
| Day avg. bout length $CV_{\epsilon}$   | <b>0.24</b>  | <b>0.28</b>  | <b>-0.35</b>      | <b>-0.37</b>    | <b>0.38</b>            | <b>0.86</b>          | <b>0.26</b>     | -0.06                       | 0.10                      | <b>0.52</b>                       | <b>0.50</b>                     | <b>0.57</b>                            |                                      | 0.07                            |
| Waking activity $CV_{\epsilon}$        | <b>0.22</b>  | <b>0.27</b>  | <b>-0.17</b>      | 0.02            | <b>0.18</b>            | <b>0.33</b>          | <b>0.33</b>     | -0.13                       | -0.06                     | 0.06                              | <b>0.17</b>                     | 0.05                                   | <b>0.55</b>                          |                                 |
