# Supplementary material for: Genome-wide association study of sleep in Drosophila melanogaster
Source: PubMed Central journal article supplement (PMC3644253; doi:10.1186/1471-2164-14-281), 2013-04-25
Supplement: 1471-2164-14-281-S2.pdf [file 1471-2164-14-281-S2.pdf]

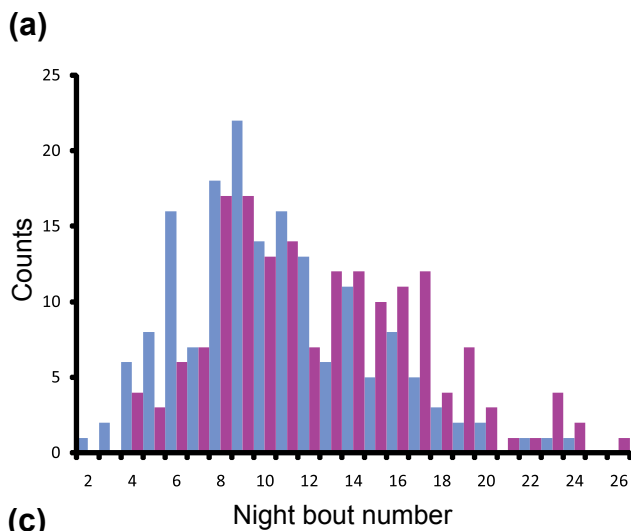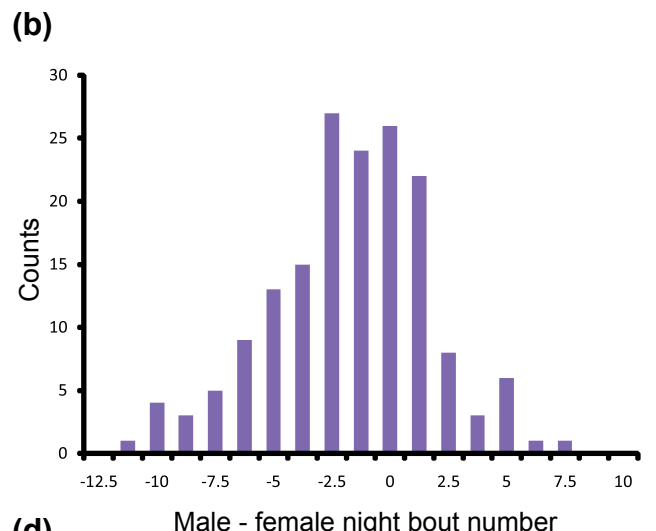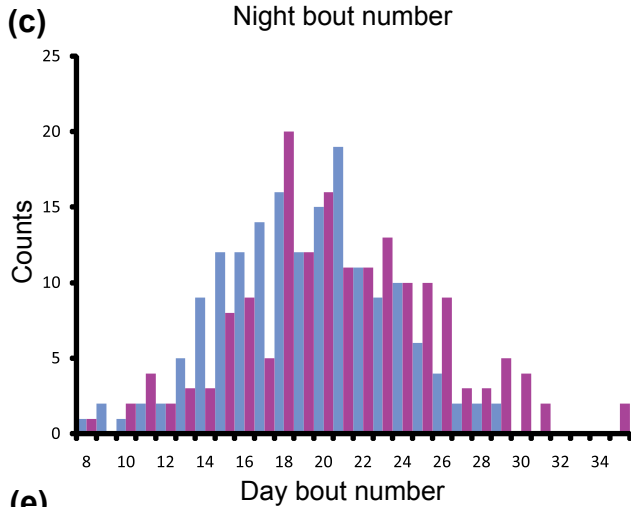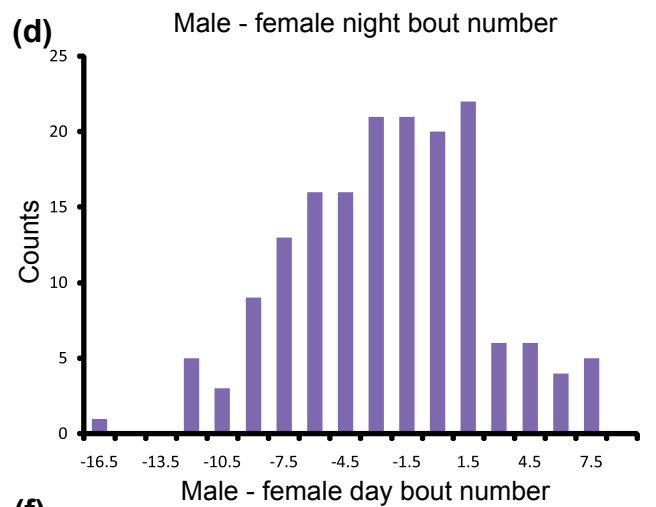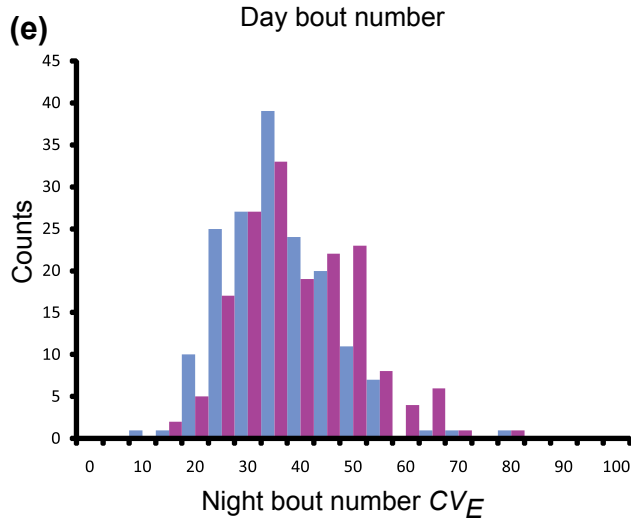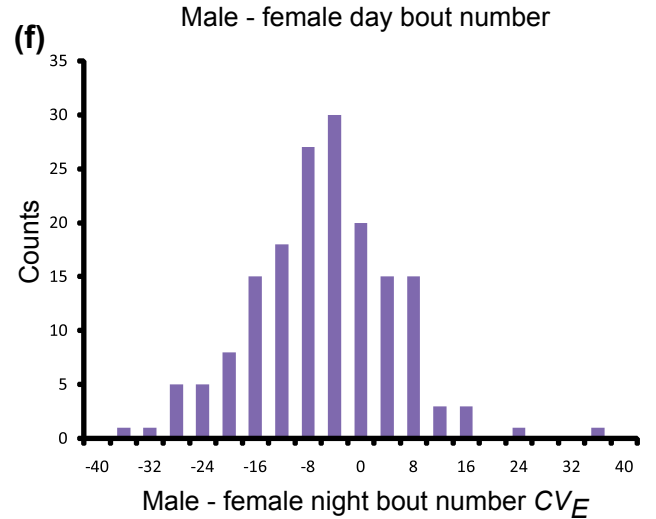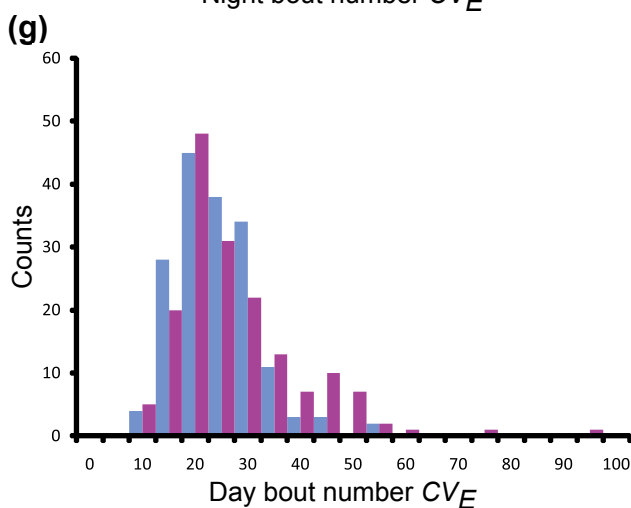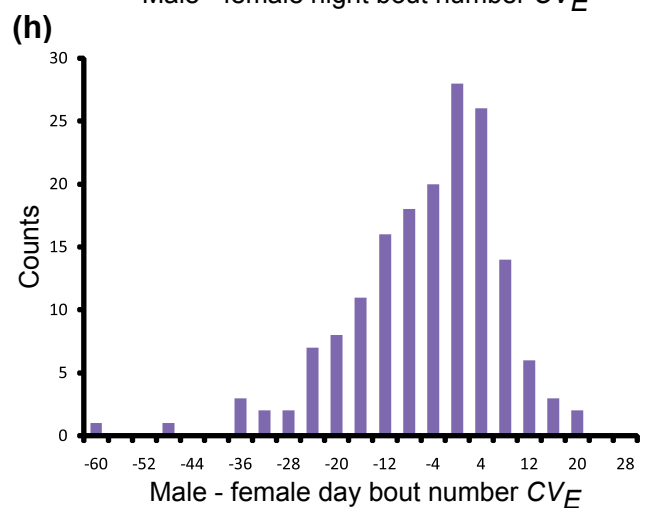

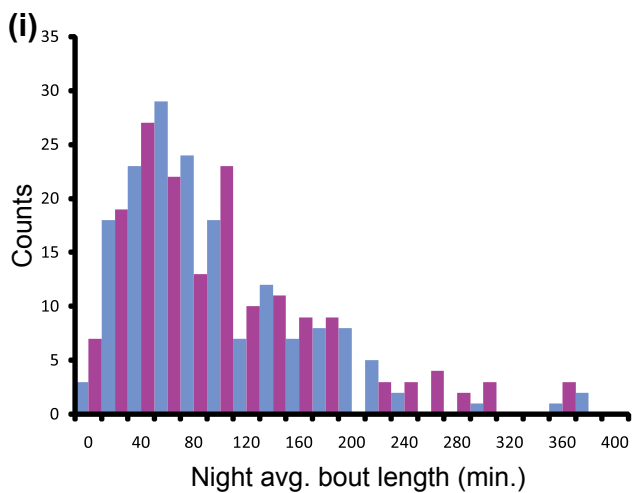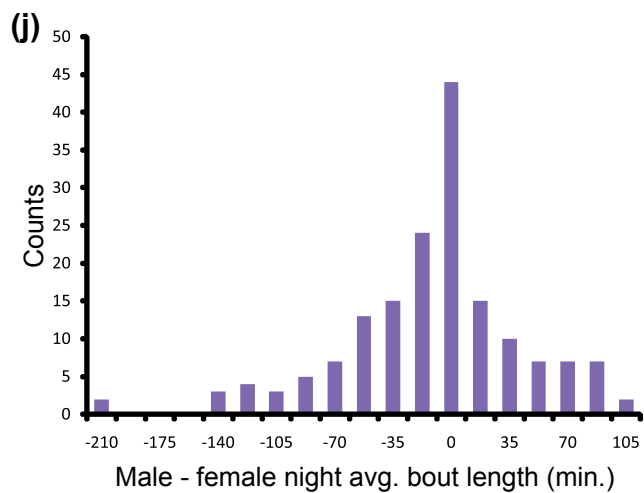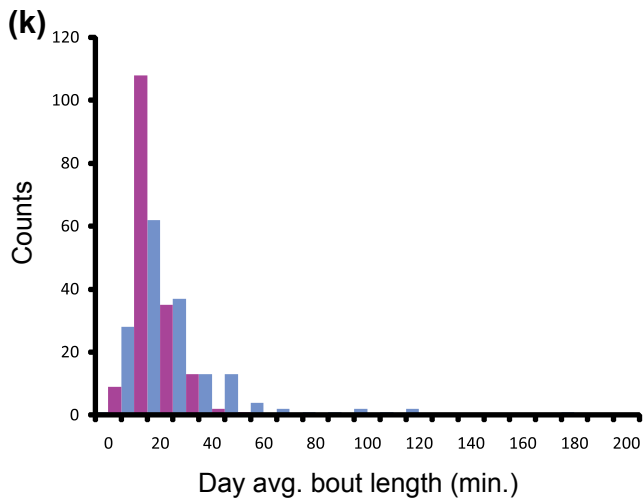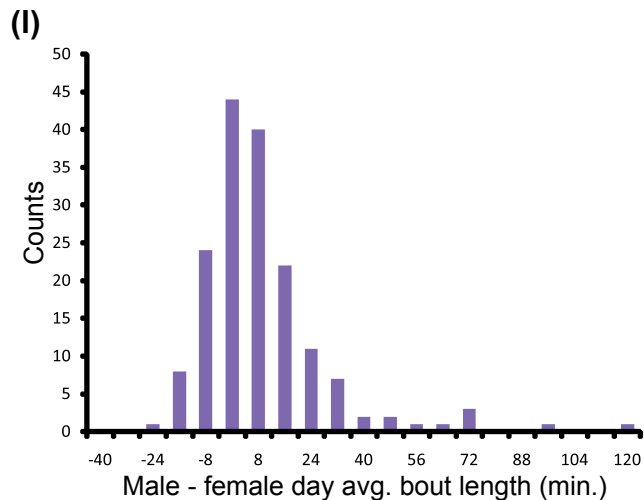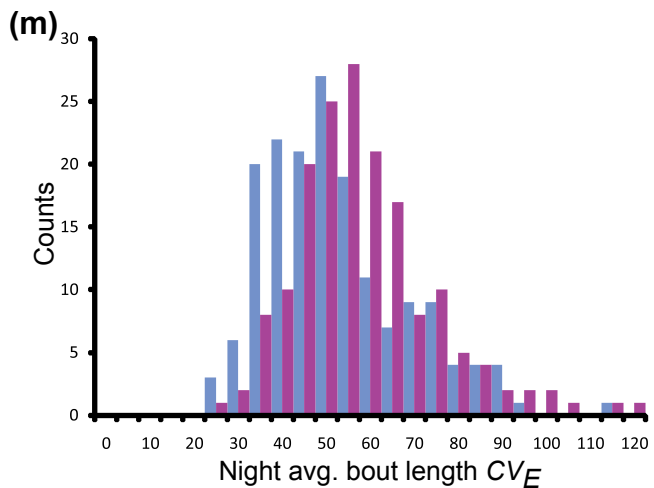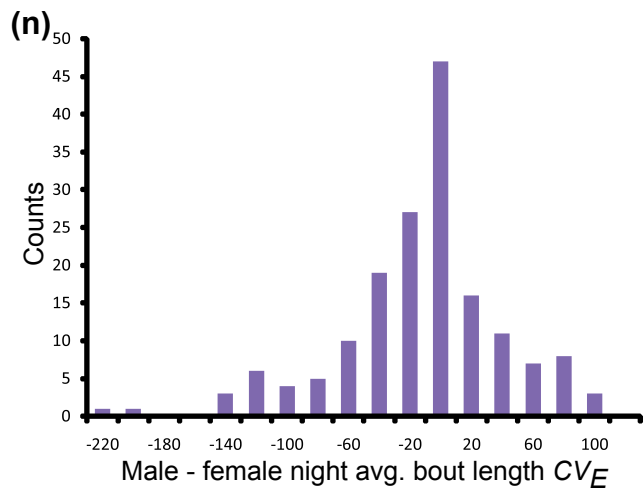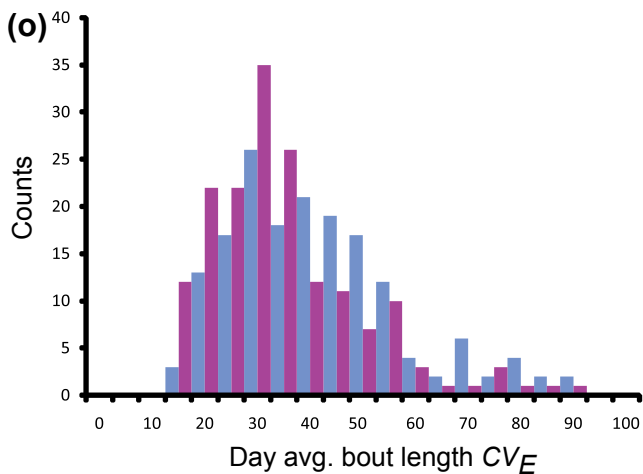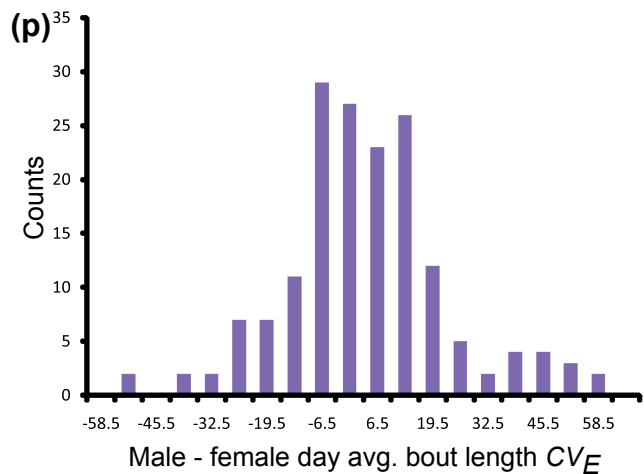

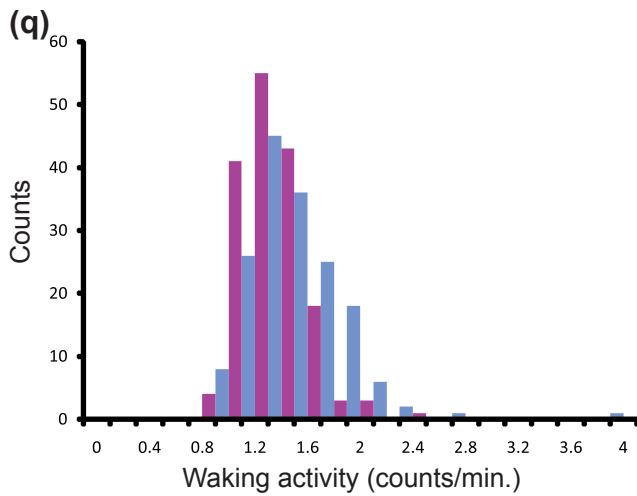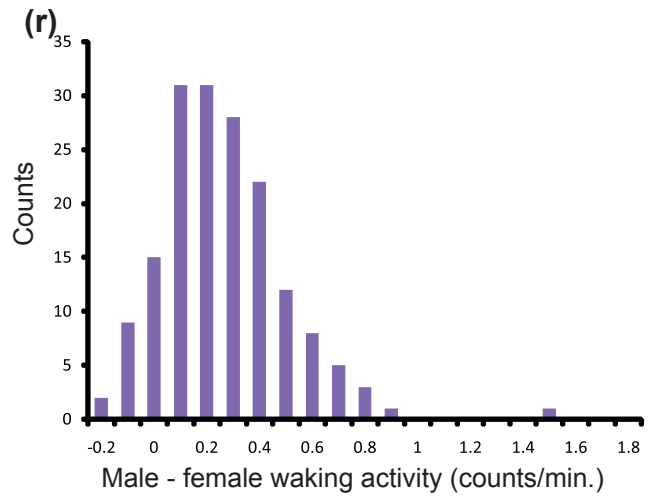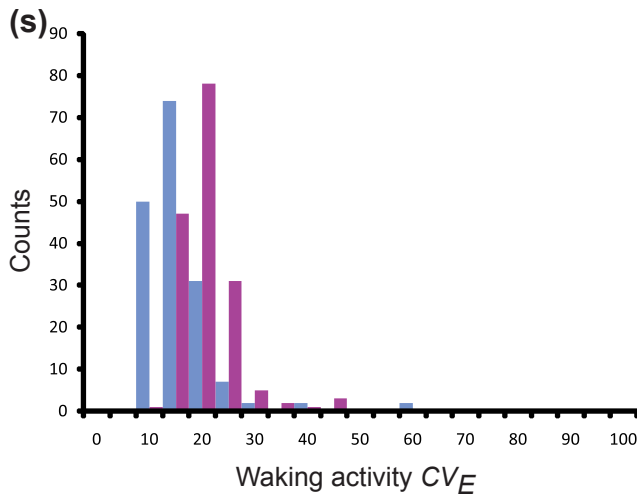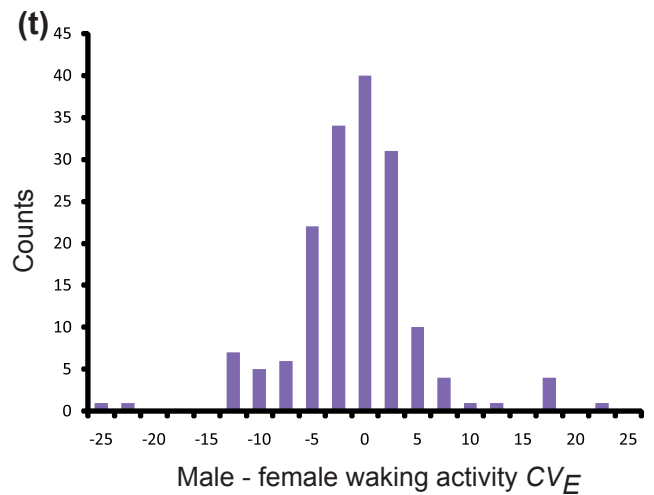

Additional file 2. Histograms of mean and coefficient of environmental variation ( $CV_E$ ).

Male lines are shown in blue, while female lines are shown in pink. The difference in line means (male - female) is shown by purple bars. (a) Night bout number. (b) Male - female night bout number. (c) Day bout number. (d) Male - female day bout number. (e) Night bout number  $CV_E$ . (f) Male - female night bout number  $CV_E$ . (g) Day bout number  $CV_E$ . (h) Male - female day bout number  $CV_E$ . (i) Night avg. bout length. (j) Male - female night avg. bout length. (k) Day avg. bout length. (l) Male - female day avg. bout length. (m) Night avg. bout length  $CV_E$ . (n) Male - female night avg. bout length  $CV_E$ . (o) Day avg. bout length  $CV_E$ . (p) Male - female day avg. bout length  $CV_E$ . (q) waking activity. (r) Male - female waking activity. (s) Waking activity  $CV_E$ . (t) Male - female waking activity  $CV_E$ .
