# Supplementary material for: Genome-wide association study of sleep in Drosophila melanogaster
Source: PubMed Central journal article supplement (PMC3644253; doi:10.1186/1471-2164-14-281), 2013-04-25
Supplement: 1471-2164-14-281-S11.pdf [file 1471-2164-14-281-S11.pdf]

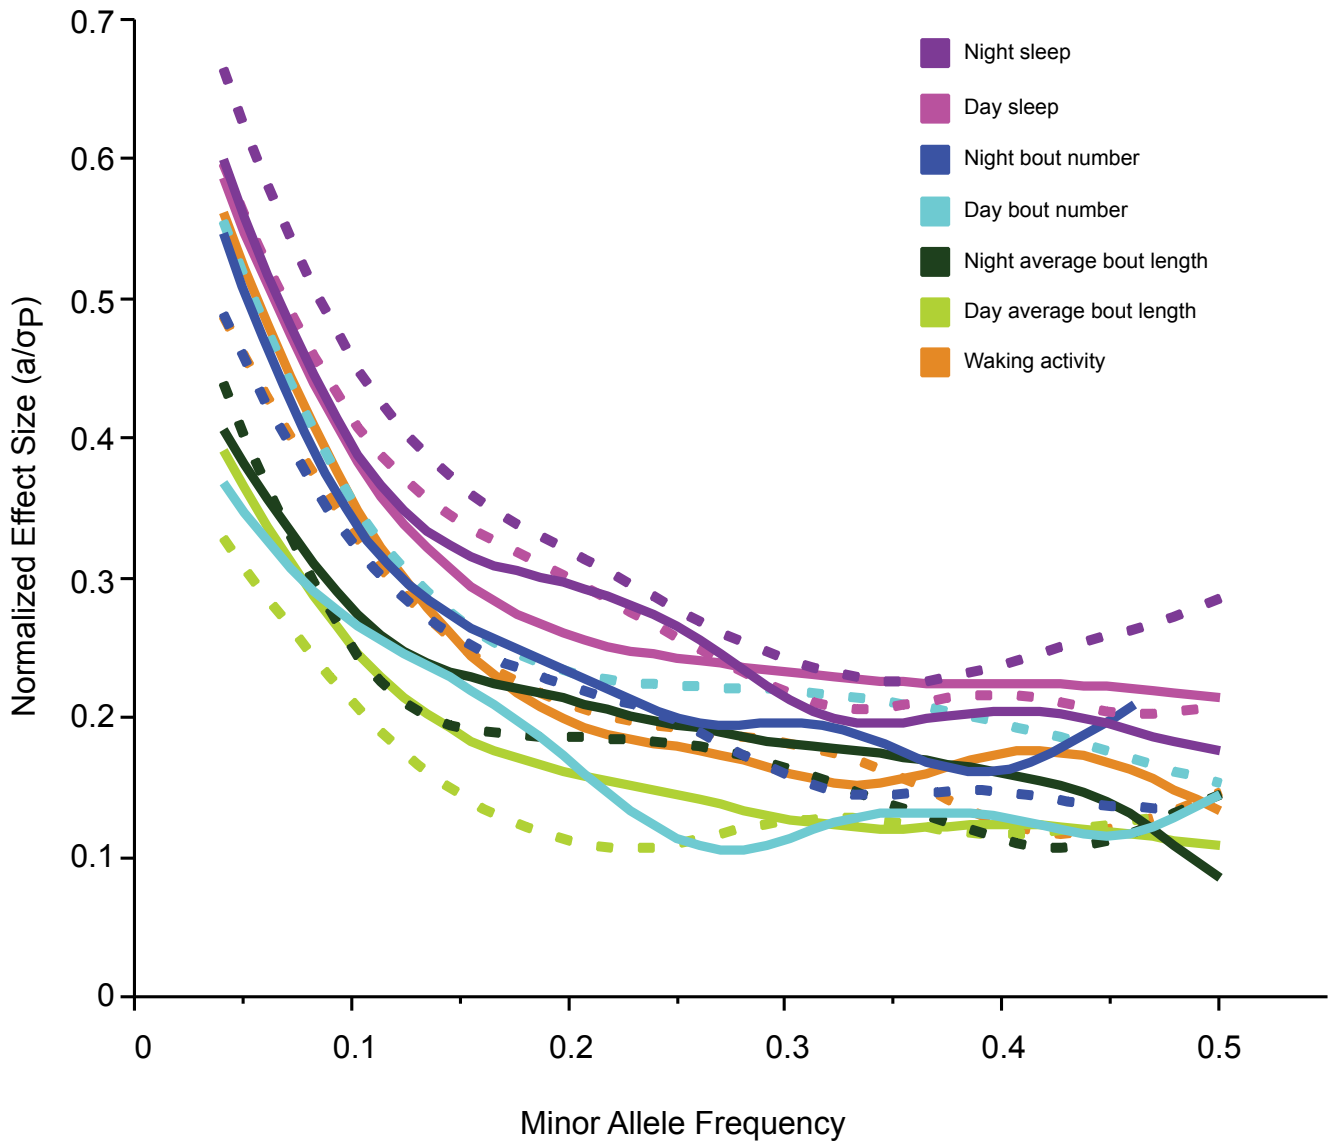

Additional file 11. Minor allele frequency vs. normalized effect size.  
 Solid and dashed lines represent the trait mean and  $CV_E$ , respectively.
