# Supplementary material for: Genome-wide association study of sleep in Drosophila melanogaster
Source: PubMed Central journal article supplement (PMC3644253; doi:10.1186/1471-2164-14-281), 2013-04-25
Supplement: 1471-2164-14-281-S17.pdf [file 1471-2164-14-281-S17.pdf]

Additional file 17. Pleiotropic effects in candidate genes

An asterisk (\*) indicates a trait that does not have a significant genetic correlation with the trait(s) in which the gene was identified.

| Gene    | Trait identified in GWAS                                       | Trait pleiotropic effect observed                                                                                                                                                                                                                                             |
|---------|----------------------------------------------------------------|-------------------------------------------------------------------------------------------------------------------------------------------------------------------------------------------------------------------------------------------------------------------------------|
| brinker | Night sleep<br>Night sleep CV <sub>E</sub>                     | Day bout number*<br>Day sleep<br>Night bout number<br>Waking activity*<br>Day avg. bout length<br>Day bout number CV <sub>E</sub><br>Waking activity CV <sub>E</sub><br>Night avg. bout length CV <sub>E</sub>                                                                |
| CG11163 | Night sleep CV <sub>E</sub>                                    | Day bout number*<br>Day sleep<br>Night bout number<br>Waking activity*<br>Day avg. bout length<br>Night avg. bout length<br>Day bout number CV <sub>E</sub>                                                                                                                   |
| CG12163 | Night sleep CV <sub>E</sub>                                    | Day bout number*<br>Day sleep<br>Night bout number<br>Waking activity*<br>Day avg. bout length<br>Night avg. bout length                                                                                                                                                      |
| CG14545 | Night sleep<br>Night sleep CV <sub>E</sub>                     | Day bout number*<br>Day sleep<br>Waking activity*                                                                                                                                                                                                                             |
| fz      | Night sleep CV <sub>E</sub><br>Waking activity CV <sub>E</sub> | Day bout number*<br>Day sleep<br>Night bout number<br>Night sleep<br>Day avg. bout length<br>Night avg. bout length<br>Day bout number CV <sub>E</sub><br>Night bout number CV <sub>E</sub><br>Day avg. bout length CV <sub>E</sub><br>Night avg. bout length CV <sub>E</sub> |

|                |                                                                          |                                                                                                                                                    |
|----------------|--------------------------------------------------------------------------|----------------------------------------------------------------------------------------------------------------------------------------------------|
| <i>Hey</i>     | Night sleep $CV_E$                                                       | Day bout number*<br>Day sleep<br>Night bout number<br>Night sleep<br>Waking activity*<br>Day avg. bout length<br>Night avg. bout length            |
| <i>scrib</i>   | Night sleep<br>Night sleep $CV_E$<br>Waking activity $CV_E$              | Day bout number*<br>Day sleep<br>Night bout number<br>Waking activity<br>Day avg. bout length<br>Night avg. bout length<br>Day bout number $CV_E$  |
| <i>tkv</i>     | Day bout number $CV_E$<br>Waking activity $CV_E$                         | Day bout number<br>Night bout number<br>Night sleep<br>Waking activity<br>Day avg. bout length<br>Night avg. bout length<br>Night sleep $CV_E$     |
| <i>Ubx</i>     | Day avg. bout length<br>Day bout number $CV_E$<br>Waking activity $CV_E$ | Day bout number<br>Day sleep<br>Night sleep<br>Waking activity<br>Day sleep $CV_E$<br>Night avg. bout length $CV_E$                                |
| <i>unc-119</i> | Night sleep<br>Night sleep $CV_E$                                        | Day bout number*<br>Day sleep<br>Night bout number<br>Waking activity*<br>Day avg. bout length<br>Night avg. bout length<br>Waking activity $CV_E$ |
| <i>Vmat</i>    | Night sleep<br>Night sleep $CV_E$<br>Day avg. bout length                | Night bout number<br>Waking activity<br>Night avg. bout length                                                                                     |
